# Supplementary material for: Rational design of a biomimetic glue with tunable strength and ductility
Source: Royal Society of Chemistry journal article supplement (doi:10.1039/c6py02232d), 2017-01-01
Supplement: c6py02232d1.pdf [file c6py02232d1.pdf]

## **Supporting Information**

# **Rational design of a biomimetic glue with tunable strength and ductility**

Debabrata Payra,<sup>a,b</sup> Yoshihisa Fujii,<sup>c,d</sup> Sandip Das,<sup>b</sup> Junko Takaishi,<sup>b</sup> and Masanobu Naito<sup>\*b</sup>

<sup>a</sup>International Center for Young Scientists (ICYS), National Institute for Materials Science (NIMS), 1-2-1 Sengen, Tsukuba, Ibaraki 305-0047, Japan

<sup>b</sup>Adhesive Materials Group, Research Center for Structural Materials (RCSM), National Institute for Materials Science (NIMS), 1-2-1 Sengen, Tsukuba, Ibaraki 305-0047, Japan

<sup>c</sup>Separation Functional Materials Group, Research Center for Structural Materials, National Institute for Materials Science (NIMS), 1-1 Namiki, Tsukuba, Ibaraki 305-0044, Japan

<sup>d</sup>Department of Chemistry for Materials, Mie University, 1577 Kurimamachiya-cho, Tsu, Mie 514-8507, Japan

For all correspondence: NAITO.Masanobu@nims.go.jp

Commercially available monomers:

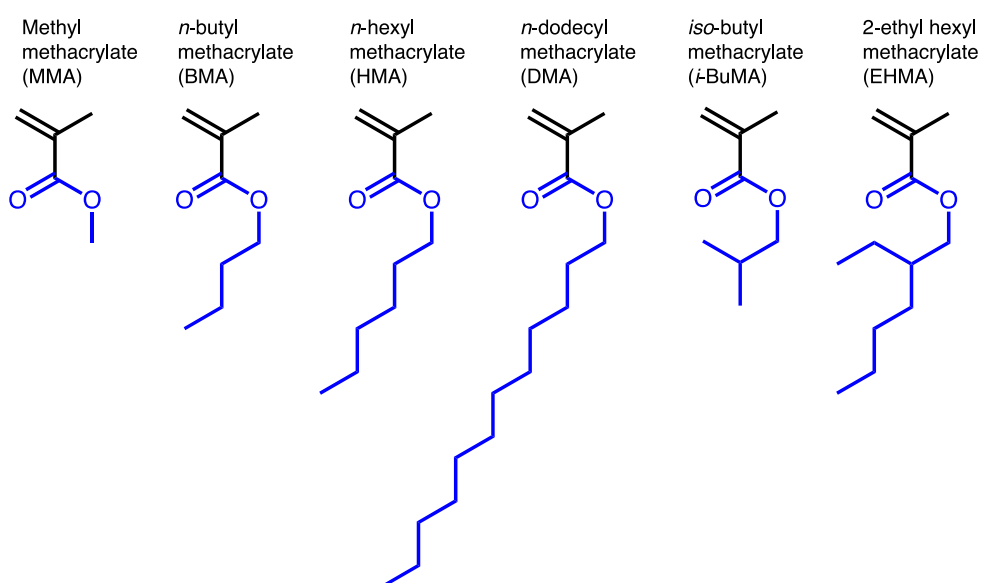

**Figure S1:** Chemical structures of commercially available methacrylate monomers used in the present study.

Synthesized monomers:

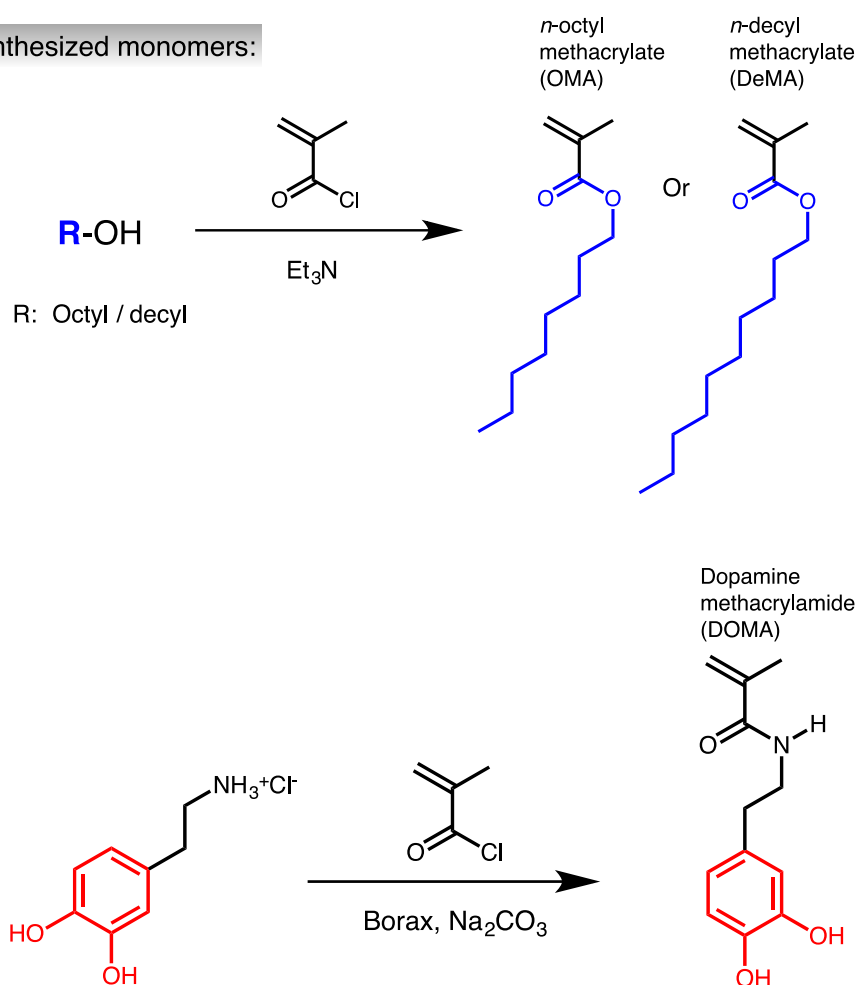

**Scheme S1:** Chemical structures of alkyl methacrylate and dopamine appended methacrylamide monomers synthesized in the present study. For detailed synthetic procedure and characterization, see ref. 24 and 44.

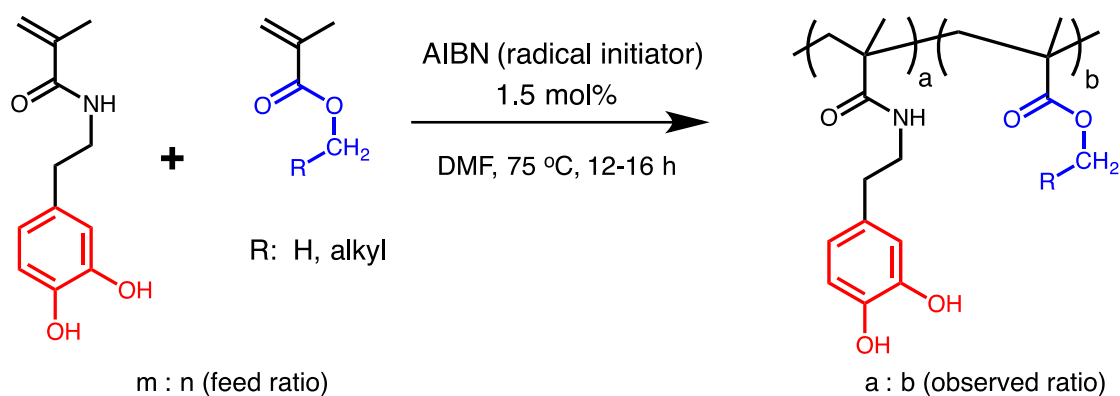

**Scheme S2:** Radical initiated random copolymerization of dopamine methacrylamide (DOMA) with various combinations and composition of alkyl methacrylates.

| Polymer name           | Feed (mol %) |     | Observed (mol %) |     | $M_w$ [g/mol], (PDI) | Temperature of 10% decomposition (°C) | $T_g$ (°C) |
|------------------------|--------------|-----|------------------|-----|----------------------|---------------------------------------|------------|
|                        | DOMA         | AMA | DOMA             | AMA |                      |                                       |            |
| Poly 1<br>[DOMA-MMA]   | 16           | 84  | 12               | 88  | 24,000 (2.2)         | 349                                   | 124        |
| Poly 2<br>[DOMA-BMA]   | 16           | 84  | 11               | 89  | 13,000 (1.5)         | 289                                   | 72         |
| Poly 3<br>[DOMA-HMA]   | 20           | 80  | 12               | 88  | 14,000 (1.5)         | 320                                   | 36         |
| Poly 4<br>[DOMA-OMA]   | 20           | 80  | 11               | 89  | 20,800 (1.7)         | 318                                   | 13         |
| Poly 5<br>[DOMA-DeMA]  | 25           | 75  | 10               | 90  | 16,000 (1.5)         | 300                                   | -41        |
| Poly 6<br>[DOMA-DMA]   | 33           | 67  | 11               | 89  | 32,000 (1.6)         | 324                                   | -56        |
| Poly 7<br>[DOMA-iBuMA] | 16           | 84  | 12               | 88  | 13,000 (1.4)         | 335                                   | 87         |
| Poly 8<br>[DOMA-EHMA]  | 20           | 80  | 10               | 90  | 28,000 (1.9)         | 345                                   | 22         |

**Table S1:** Compositions and key parameters of different polymers with various alkyl chain lengths and branching. Observed molar ratio was estimated from  $^1\text{H}$  NMR. Molecular weight ( $M_w$ ) and polydispersity index (PDI;  $M_w/M_n$ ) was calculated from gel permeation chromatography (GPC) using polystyrene standards.

**DOMA-OMA (Poly 4a-f) series:**

| Polymer code                | Feed (mol %) |     | Observed (mol %) |     | $M_w$ [g/mol], (PDI) | $T_g$ (°C) |
|-----------------------------|--------------|-----|------------------|-----|----------------------|------------|
|                             | DOMA         | AMA | DOMA             | AMA |                      |            |
| Poly <b>4a</b><br>(control) | 0            | 100 | 0                | 100 | 22,000 (1.5)         | -45        |
| Poly <b>4b</b>              | 6            | 94  | 2                | 98  | 22,600 (1.6)         | -38        |
| Poly <b>4c</b>              | 13           | 87  | 7                | 93  | 23,000 (1.6)         | -22        |
| Poly <b>4d</b>              | 17           | 83  | 9                | 91  | 20,400 (1.6)         | -4         |
| Poly <b>4e</b>              | 20           | 80  | 11               | 89  | 20,800 (1.7)         | 13         |
| Poly <b>4f</b>              | 33           | 67  | 16               | 84  | 13,000 (1.5)         | 36         |

**Table S2:** Series of DOMA-co-OMA (Poly 4a-f) copolymers containing *n*-octyl side chains. Variation of final DOMA content was achieved by changing monomer feed ratio. Molecular weight ( $M_w$ ) and glass transition temperature ( $T_g$ ) data have also been provided for each sample.

**DOMA-EHMA (Poly 8a-g) series:**

| Polymer code                | Feed (mol %) |     | Observed (mol %) |     | $M_w$ [g/mol], (PDI) | $T_g$ (°C) |
|-----------------------------|--------------|-----|------------------|-----|----------------------|------------|
|                             | DOMA         | AMA | DOMA             | AMA |                      |            |
| Poly <b>8a</b><br>(control) | 0            | 100 | 0                | 100 | 15,700 (1.4)         | -2         |
| Poly <b>8b</b>              | 6            | 94  | 1                | 99  | 22,500 (1.4)         | 2          |
| Poly <b>8c</b>              | 11           | 89  | 3                | 97  | 23,200 (1.4)         | 6          |
| Poly <b>8d</b>              | 14           | 86  | 6                | 94  | 20,600 (1.6)         | 12         |
| Poly <b>8e</b>              | 17           | 83  | 8                | 92  | 20,600 (1.6)         | 16         |
| Poly <b>8f</b>              | 20           | 80  | 10               | 90  | 28,000 (1.9)         | 22         |
| Poly <b>8g</b>              | 25           | 75  | 15               | 85  | 14,200 (1.6)         | 30         |

**Table S3:** Series of DOMA-co-EHMA (Poly 8a-g) copolymers containing 2-ethyl hexyl side chains. Variation of final DOMA content was achieved by changing monomer feed ratio. Molecular weight ( $M_w$ ) and glass transition temperature ( $T_g$ ) data have also been provided for each sample.

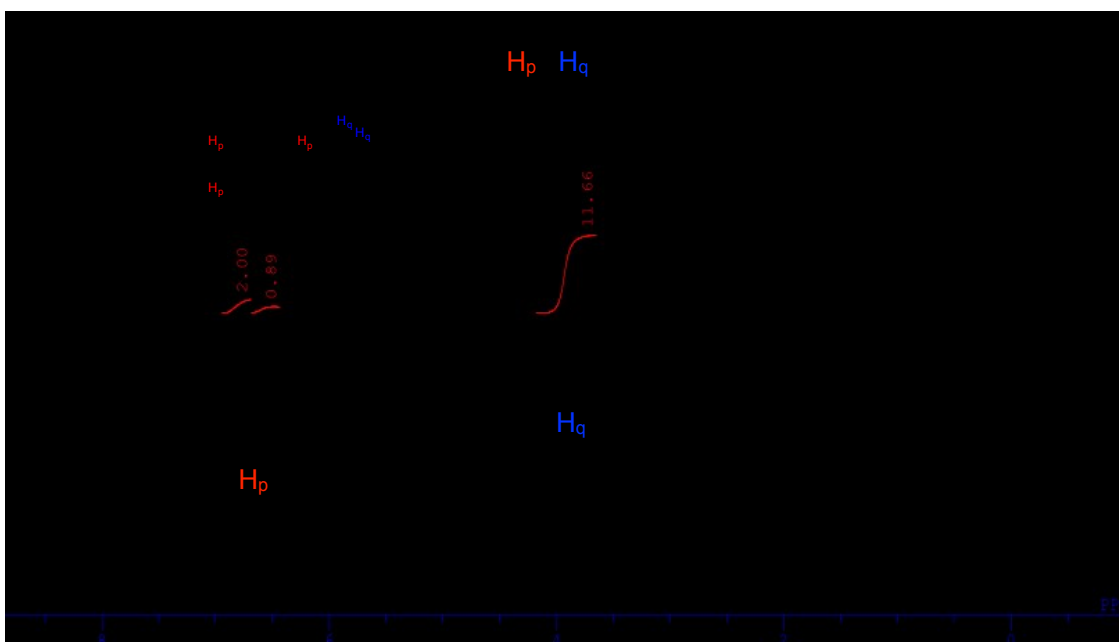

**Figure S2:** A typical  $^1\text{H}$  NMR spectra of copolymers in  $\text{CDCl}_3$  at 298K. The final molar ratio of DOMA unit and alkyl methacrylate units were estimated from integral ratio of peak around 6.5-7.0 ppm (aromatic protons) and 4.0 ppm ( $-\text{OCH}_2-$ ), respectively.

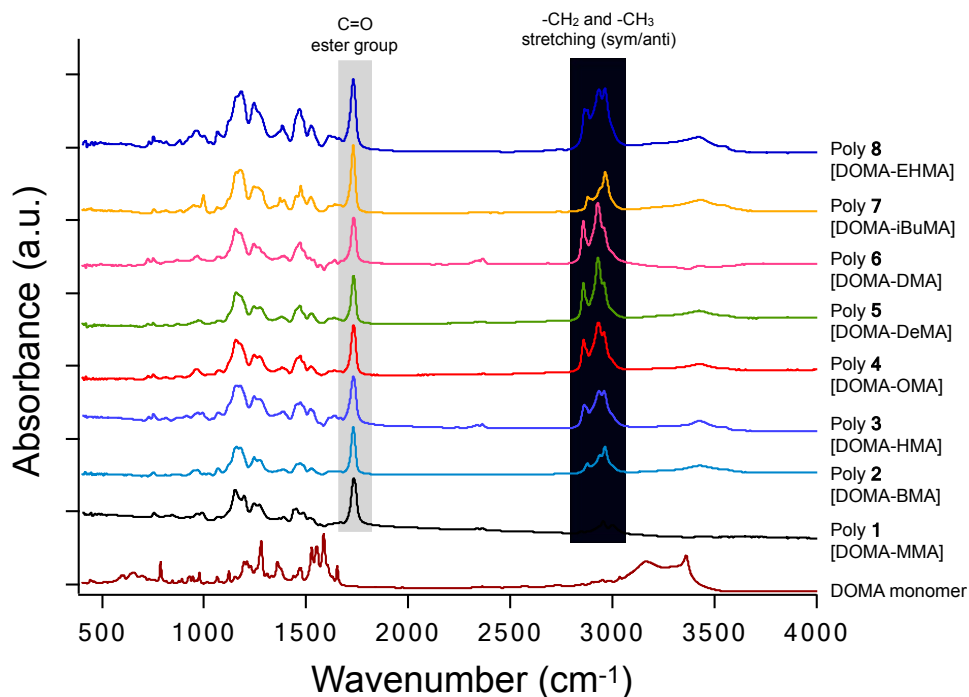

**Figure S3:** FT-IR comparison among DOMA monomer and copolymers in KBr pellet. For DOMA monomer, broad peak around  $3000\sim 3400\text{ cm}^{-1}$  is due to amide (N-H) and catechol (O-H) segments. The most characteristic peaks for all copolymers (poly 1-8) were from alkyl methacrylate units, major part of these polymers. Presence of typical alkyl  $-\text{CH}_2-$  &  $-\text{CH}_3$  stretchings ( $\sim 2800\text{-}2950\text{ cm}^{-1}$ ) and ester group ( $1750\text{ cm}^{-1}$ ) was observed for all cases.

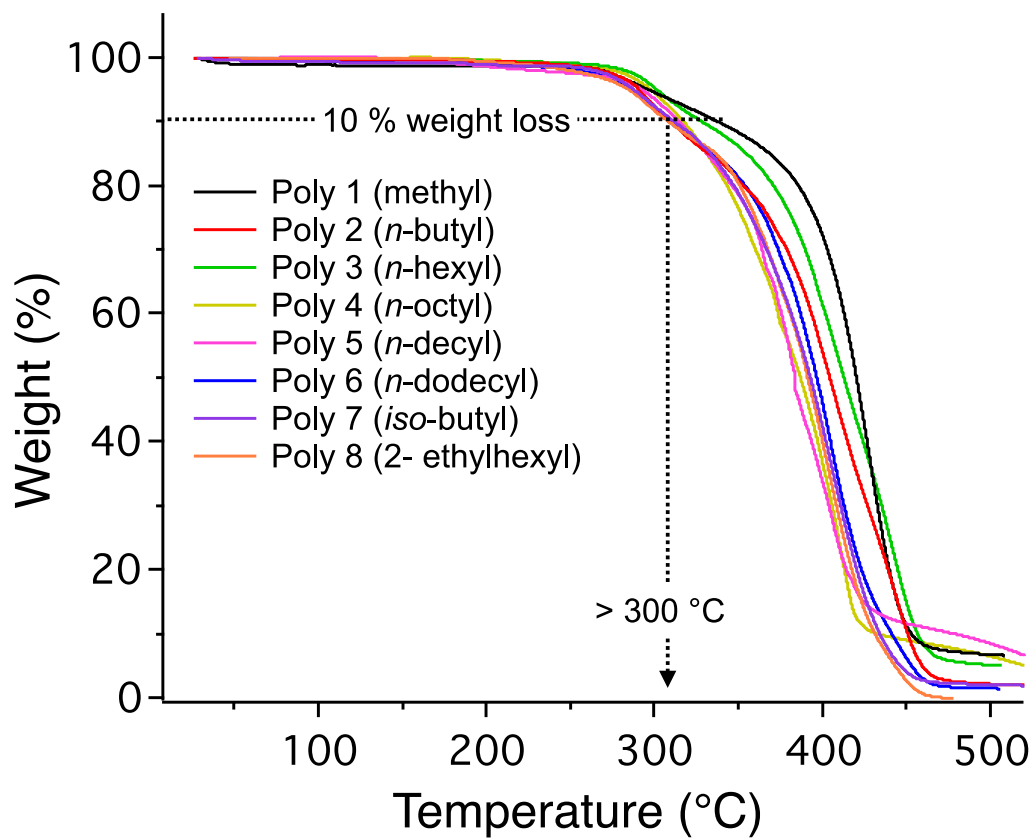

**Figure S4:** Thermo gravimetric analysis (TGA) plots of different copolymers. There was no decomposition or unusual peak below 200 °C, indicates absence of any residual solvent or small molecules. Only ~10 % weight loss was observed close to 300 °C most of the cases, implying good thermal stability. However, the polymers completely decomposed above 450 °C.

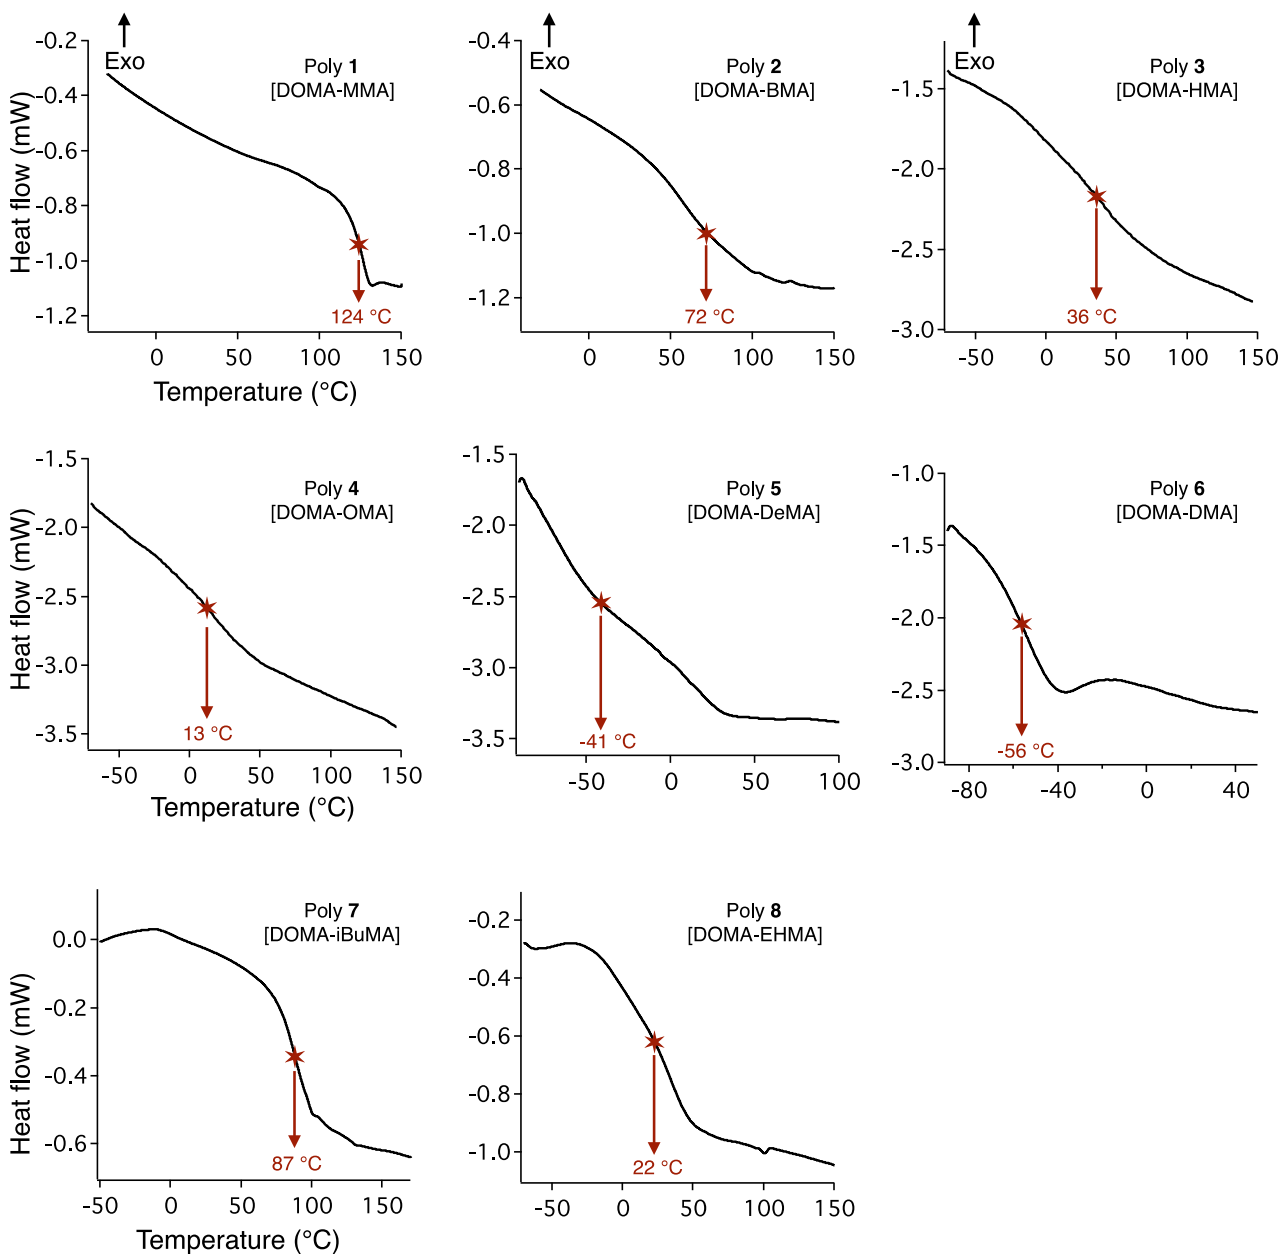

**Figure S5:** Differential scanning calorimetry (DSC) thermograms of different copolymers. There was significant variation of glass transition temperature ( $T_g$ ) with alkyl chain length. For example, shorter chains like methyl and butyl copolymers (poly 1, 2) have  $T_g$  at 124 °C and 72 °C, respectively. On the other hand, very long chains like decyl or dodecyl (poly 5,6) exhibited  $T_g$  at very low temperature -41 °C and -56 °C, respectively. These informations were very useful to assess the chain mobility and related influence on bonding strength.

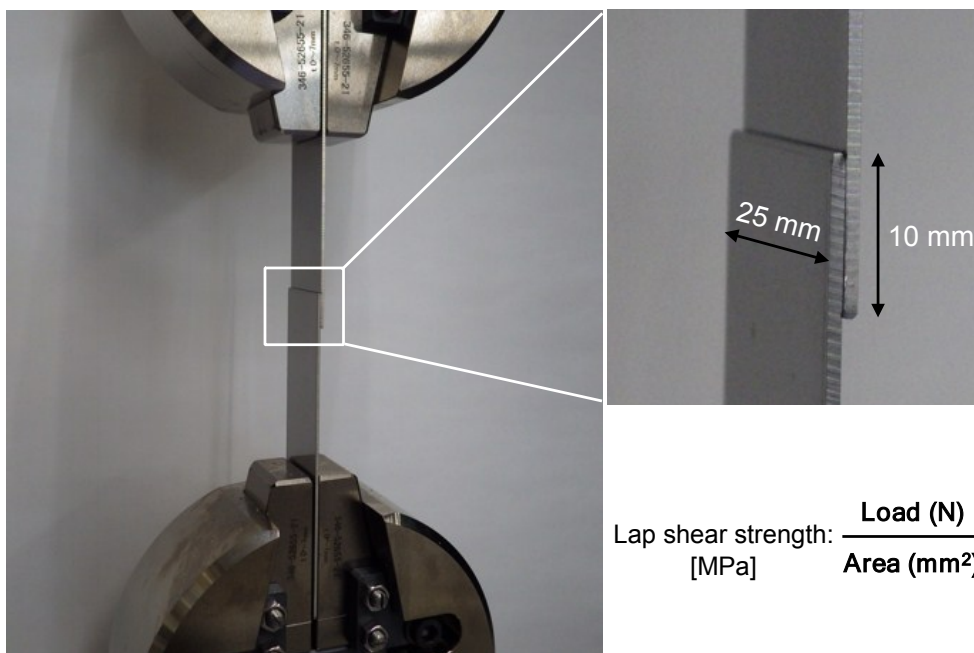

**Figure S6:** Photograph of a single-lap joint aluminum substrate, installed for lap-shear test. The trails were performed using 10,000 N load cell and crosshead speed of 2 mm.min<sup>-1</sup>. Overlapped area for all measurements was maintained same (10 mm x 25 mm), and reported strength in MPa is highest load (N) gained divided by area (mm<sup>2</sup>).

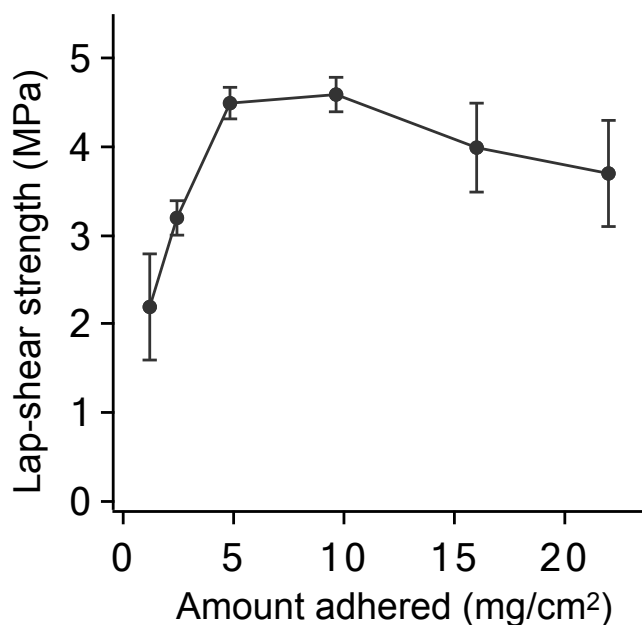

**Figure S7:** Dependence of bonding strength on amount adhered on the substrates. Substrate was aluminum and curing temperature was maintained at 70 °C for all cases.



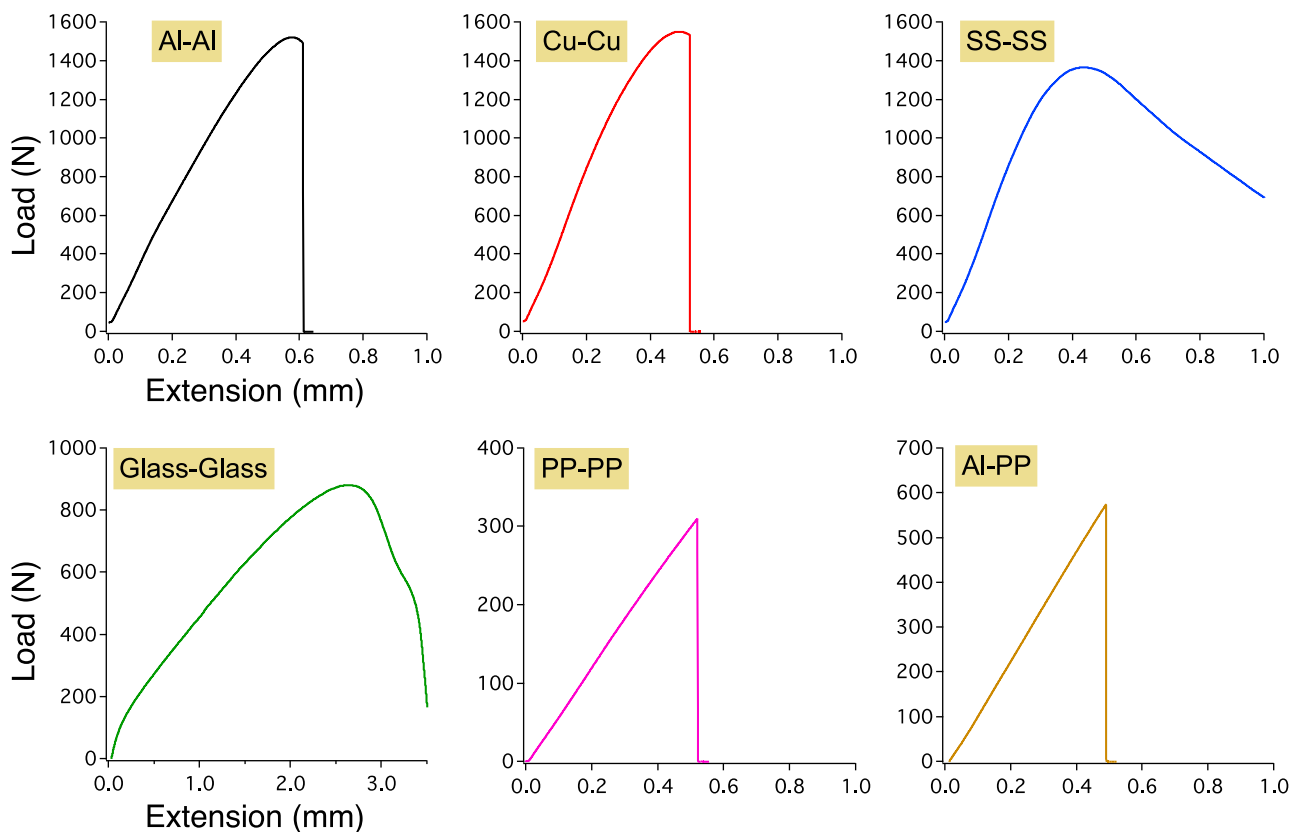

**Figure S8:** Raw profiles (load vs extension) of lap-shear test using different substrates under best molecular composition and formulation conditions achieved in the present study. Metal substrates (Al, Cu, SS) exhibited highest load in the range of 1400-1600 N when extension was close to 0.4-0.5 mm (5 % strain). Highest loading ability for glass substrate was ~ 900 N, but extension was much higher than metals (2.5 mm, 25 % strain). On the other hand, plastic substrates yielded lower strength than both metals/glass in both similar and dissimilar attachments. It was clear that, the bonding nature and performance depends on parameters including substrate modulus, substrate-adhesive interfacial interactions, and others under same formulation conditions.

|                             | Adhesive name                                                     | Strength (MPa) | Reference      |
|-----------------------------|-------------------------------------------------------------------|----------------|----------------|
| <i>Commercial glues</i>     | Ethylcyanoacrylate ( Krazy glue)                                  | $7 \pm 1$      | R1             |
|                             | Epoxy (Loctite quick-set)                                         | $18 \pm 2$     | R2             |
|                             | Poly(vinyl acetate) (Elmer's glue)                                | $3.8 \pm 0.6$  | R2             |
| <i>Mussel-mimetic glues</i> | Poly[(3,4-dihydroxystyrene)- <i>co</i> -styrene]                  | $11 \pm 0.5$   | R2             |
|                             | Poly(DOMA- <i>co</i> -MMA)                                        | $1.3 \pm 0.6$  | R3             |
|                             | Poly(DOMA- <i>co</i> -MMA- <i>co</i> -PEGMA)                      | $3 \pm 0.5$    | R3             |
|                             | Poly[(3,4-dihydroxystyrene)- <i>co</i> -styrene- <i>co</i> -VMEG] | $2.3 \pm 0.5$  | R4             |
|                             | U1444-DMPA-DA                                                     | $5.2 \pm 0.5$  | R5             |
|                             | Poly(DOMA- <i>co</i> -EHMA)                                       | $6 \pm 0.3$    | Present report |

Dopamine methacrylamide (DOMA); poly (ethylene glycol) methyl ether methacrylate (PEGMA); 4-vinylbenzyl[methyltetra(ethylene glycol)] (VMEG);

**Table S4:** A summary of adhesive strength among present adhesive system, commercial glues and other DOPA-based synthetic polymer adhesives, reported earlier. Adhesive strength evaluated only by single-lap joint method and for metal substrates has been considered for this comparison, because bonding performance is often dependent on multiple factors, including evaluation method, formulation conditions, substrates, among others.

## References:

- R1. C. R. Matos-Pérez, J. D. White and J. J. Wilker, *J. Am. Chem. Soc.*, 2012, **134**, 9498-9505.
- R2. H. J. Meredith, C. L. Jenkins and J. J. Wilker, *Adv. Funct. Mater.*, 2014, **24**, 3259-3267.
- R3. H. J. Meredith and J. J. Wilker, *Adv. Funct. Mater.*, 2015, **25**, 5057-5065.
- R4. C. R. Matos-Pérez and J. J. Wilker, *Macromolecules*, 2012, **45**, 6634-6639.
- R5. P. Y. Sun, L. Y. Tian, Z. Zheng and X. L. Wang, *Acta. Polym. Sin.*, 2009, **1**, 803-808.
